# Supplementary material for: Double deuterated acetylacetone in neon matrices: infrared spectroscopy, photoreactivity and the tunneling process
Source: Royal Society of Chemistry journal article supplement (doi:10.1039/c6cp02796b), 2016-01-01
Supplement: c6cp02796b1.pdf [file c6cp02796b1.pdf]

## SUPPLEMENTARY INFORMATION

Optimized geometry parameters for CCC conformer of double deuterated acetylacetone, obtained with B3LYP functional and 6-311++g(3df,3pd) basis set. Distance (R), angle (A) and dihedral angle (D).

| Atoms involved      | Parameter    | Value  |
|---------------------|--------------|--------|
| CH <sub>3</sub> -C  | R(1-5)       | 1.51   |
| C-C                 | R(5-6)       | 1.44   |
| C=O                 | R(5-13)      | 1.24   |
| C-H                 | R(6-7)       | 1.08   |
| C=C                 | R(6-8)       | 1.37   |
| C-CH <sub>3</sub>   | R(8-9)       | 1.49   |
| C-O                 | R(8-14)      | 1.32   |
| O··H                | R(13-15)     | 1.61   |
| O-H                 | R(14-15)     | 1.00   |
| C-C-CH <sub>3</sub> | A(1-5-6)     | 118.61 |
| C-C=O               | A(6-5-13)    | 121.57 |
| C-C-H               | A(5-6-7)     | 119.86 |
| HOC-C-CO            | A(5-6-8)     | 120.71 |
| H-C-COH             | A(7-6-8)     | 119.43 |
| C-C-CH <sub>3</sub> | A(6-8-9)     | 124.25 |
| C-C-OH              | A(6-8-14)    | 121.74 |
| C-O-H               | A(8-14-15)   | 106.00 |
| H-C-CO-C            | D(4-1-5-6)   | 180.00 |
| C-CO-C-H            | D(1-5-6-7)   | 0      |
| C-CO-C-COH          | D(1-5-6-8)   | 180    |
| O=C-C-COH           | D(13-5-6-8)  | 0      |
| OC-C-COH-C          | D(5-6-8-9)   | 180    |
| OC-C-C-OH           | D(5-6-8-14)  | 0      |
| C-COH-C-H           | D(6-8-9-12)  | 0      |
| C-C-O-H             | D(6-8-14-15) | 0      |

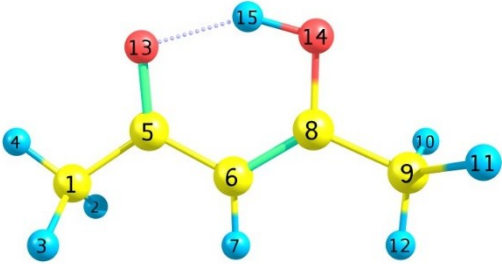

**R:** distance; **A:** angle; **D:** dihedral angle

Theoretical frequency values (and corresponding intensities: **Int**) of double deuterated acetylacetone (AcAcD<sub>2</sub>) calculated in the harmonic (**Harm**) and anharmonic (**Anharm**) approximations, with B3LYP functional and 6-311++g(3df,3pd) basis set.

| CCC    |        |       | CCT    |        |       |
|--------|--------|-------|--------|--------|-------|
| Harm   | Anharm | Int   | Harm   | Anharm | Int   |
| 3142.9 | 3003.2 | 9.6   | 3141.2 | 2996.6 | 12.1  |
| 3137.9 | 2998.7 | 9.5   | 3135.9 | 2995.9 | 7.6   |
| 3090.2 | 2949.3 | 4.8   | 3079.2 | 2940.1 | 11.0  |
| 3088.0 | 2954.3 | 6.5   | 3061.5 | 2922.1 | 9.7   |
| 3038.2 | 2928.5 | 7.8   | 3025.8 | 2946.4 | 5.4   |
| 3034.0 | 2951.5 | 2.6   | 3015.2 | 2966.0 | 23.5  |
| 2373.8 | 2297.0 | 1.3   | 2779.7 | 2680.7 | 50.7  |
| 2200.1 | 1857.1 | 259.2 | 2353.6 | 2276.1 | 3.1   |
| 1663.3 | 1616.5 | 262.7 | 1749.4 | 1713.2 | 192.5 |
| 1560.3 | 1515.2 | 374.1 | 1653.1 | 1614.0 | 427.4 |
| 1477.1 | 1445.9 | 6.8   | 1481.6 | 1451.5 | 5.6   |
| 1476.3 | 1436.7 | 86.6  | 1480.8 | 1453.3 | 24.1  |
| 1472.3 | 1433.6 | 9.1   | 1477.5 | 1440.0 | 9.8   |
| 1464.7 | 1432.6 | 38.9  | 1467.5 | 1436.7 | 14.9  |
| 1418.5 | 1390.5 | 27.9  | 1415.4 | 1401.1 | 12.2  |
| 1403.5 | 1368.0 | 11.3  | 1382.4 | 1349.2 | 27.0  |
| 1384.9 | 1354.1 | 53.9  | 1346.0 | 1313.2 | 75.1  |
| 1303.1 | 1270.3 | 125.9 | 1240.5 | 1197.1 | 216.3 |
| 1120.2 | 1076.0 | 52.3  | 1090.1 | 1064.5 | 6.8   |
| 1062.2 | 1035.5 | 1.2   | 1063.2 | 1037.7 | 0.6   |
| 1047.4 | 1027.4 | 34.3  | 1037.9 | 1015.7 | 5.0   |
| 1047.1 | 1020.9 | 6.6   | 1008.7 | 990.4  | 9.0   |
| 1009.4 | 991.5  | 9.7   | 930.4  | 919.5  | 28.2  |
| 945.7  | 933.4  | 24.5  | 927.0  | 911.4  | 14.9  |
| 891.9  | 881.8  | 16.5  | 870.5  | 860.7  | 58.4  |
| 847.7  | 837.1  | 0.5   | 854.5  | 841.6  | 16.3  |
| 749.7  | 740.9  | 38.0  | 675.0  | 664.8  | 8.4   |
| 661.0  | 646.9  | 0.6   | 625.9  | 612.1  | 13.3  |
| 641.5  | 629.4  | 14.2  | 583.8  | 575.1  | 5.0   |
| 570.5  | 562.6  | 16.2  | 535.9  | 530.8  | 0.9   |
| 558.4  | 555.9  | 0.2   | 467.1  | 468.1  | 15.8  |
| 504.7  | 502.9  | 10.5  | 371.4  | 370.7  | 4.7   |
| 390.6  | 391.8  | 2.7   | 336.9  | 338.5  | 0.4   |
| 365.7  | 358.0  | 7.2   | 316.6  | 297.8  | 42.9  |
| 228.1  | 222.3  | 3.3   | 188.6  | 176.7  | 2.3   |
| 180.5  | 167.4  | 0.1   | 171.4  | 174.1  | 3.5   |
| 148.4  | 125.9  | 0.0   | 139.0  | 136.7  | 2.3   |
| 118.2  | 92.5   | 1.2   | 103.8  | 100.8  | 0.3   |
| 27.9   | -92.1  | 0.1   | 59.4   | 56.4   | 3.8   |

| CTC    |        |       |
|--------|--------|-------|
| Harm   | Anharm | Int   |
| 3176.7 | 3030.2 | 6.1   |
| 3143.4 | 3002.3 | 10.6  |
| 3081.9 | 2940.2 | 10.3  |
| 3081.1 | 2940.5 | 6.0   |
| 3034.5 | 2935.5 | 16.1  |
| 3027.6 | 2945.7 | 4.5   |
| 2758.8 | 2672.1 | 28.8  |
| 2309.9 | 2227.6 | 11.8  |
| 1734.6 | 1701.4 | 169.6 |
| 1628.0 | 1566.1 | 544.9 |
| 1492.7 | 1451.0 | 7.5   |
| 1477.9 | 1438.8 | 8.4   |
| 1467.3 | 1435.8 | 12.4  |
| 1458.7 | 1418.0 | 80.3  |
| 1411.0 | 1378.4 | 48.6  |
| 1384.4 | 1352.1 | 30.5  |
| 1322.2 | 1288.8 | 122.2 |
| 1289.9 | 1249.6 | 15.6  |
| 1106.2 | 1079.6 | 62.5  |
| 1069.9 | 1043.6 | 1.6   |
| 1039.1 | 1018.4 | 2.7   |
| 1022.0 | 999.1  | 30.0  |
| 960.3  | 934.5  | 145.0 |
| 902.0  | 886.1  | 14.2  |
| 861.8  | 848.6  | 20.5  |
| 823.3  | 808.5  | 0.8   |
| 705.3  | 699.3  | 19.9  |
| 629.9  | 618.3  | 37.8  |
| 585.1  | 588.7  | 0.3   |
| 491.0  | 492.9  | 2.2   |
| 469.0  | 471.7  | 11.7  |
| 384.3  | 381.8  | 3.3   |
| 373.1  | 350.4  | 48.2  |
| 339.7  | 345.8  | 1.7   |
| 210.7  | 228.6  | 3.1   |
| 164.9  | 160.9  | 0.2   |
| 106.2  | 91.4   | 1.3   |
| 98.7   | 109.9  | 0.1   |
| 57.2   | 59.4   | 1.5   |

| CTT    |        |       |
|--------|--------|-------|
| Harm   | Anharm | Int   |
| 3160.0 | 3019.8 | 10.8  |
| 3142.9 | 3001.5 | 11.4  |
| 3082.1 | 2942.0 | 9.0   |
| 3058.6 | 2920.6 | 10.4  |
| 3028.5 | 2946.4 | 3.6   |
| 3012.0 | 2925.0 | 32.3  |
| 2780.2 | 2684.0 | 53.4  |
| 2343.8 | 2264.7 | 4.3   |
| 1732.2 | 1694.4 | 171.4 |
| 1649.0 | 1603.3 | 480.5 |
| 1501.6 | 1448.2 | 7.4   |
| 1476.8 | 1439.0 | 8.2   |
| 1467.0 | 1434.9 | 13.0  |
| 1459.7 | 1427.7 | 41.3  |
| 1405.5 | 1373.0 | 46.1  |
| 1384.9 | 1352.7 | 33.7  |
| 1309.9 | 1275.3 | 251.1 |
| 1290.2 | 1258.9 | 17.0  |
| 1100.7 | 1078.2 | 17.7  |
| 1070.4 | 1043.6 | 1.2   |
| 1039.1 | 1017.2 | 3.2   |
| 1019.5 | 994.6  | 35.0  |
| 954.0  | 936.6  | 63.6  |
| 916.1  | 901.1  | 112.5 |
| 850.2  | 837.7  | 5.1   |
| 819.5  | 812.8  | 1.2   |
| 720.4  | 707.1  | 12.0  |
| 630.3  | 621.8  | 36.3  |
| 584.4  | 579.9  | 0.3   |
| 493.1  | 489.0  | 2.8   |
| 457.0  | 456.9  | 4.7   |
| 393.2  | 390.5  | 1.1   |
| 341.9  | 345.4  | 2.2   |
| 299.6  | 290.6  | 50.5  |
| 212.2  | 210.6  | 10.8  |
| 167.4  | 162.4  | 0.1   |
| 133.1  | 112.9  | 0.1   |
| 101.9  | 101.1  | 0.1   |
| 62.7   | 56.9   | 8.9   |

| TCC    |        |       |
|--------|--------|-------|
| Harm   | Anharm | Int   |
| 3145.3 | 3008.2 | 7.2   |
| 3134.5 | 2995.8 | 5.5   |
| 3084.9 | 2943.3 | 6.4   |
| 3063.5 | 2896.6 | 7.2   |
| 3036.1 | 2964.9 | 11.4  |
| 3005.0 | 2905.5 | 8.9   |
| 2767.4 | 2661.9 | 51.9  |
| 2359.2 | 2279.1 | 0.7   |
| 1716.4 | 1686.3 | 232.3 |
| 1648.4 | 1614.0 | 397.3 |
| 1495.6 | 1486.7 | 10.1  |
| 1486.4 | 1471.2 | 11.5  |
| 1479.3 | 1451.2 | 35.9  |
| 1473.6 | 1433.5 | 7.7   |
| 1421.2 | 1407.8 | 33.1  |
| 1377.7 | 1342.4 | 67.1  |
| 1353.7 | 1319.2 | 101.3 |
| 1234.5 | 1202.8 | 67.6  |
| 1116.8 | 1093.3 | 41.3  |
| 1065.4 | 1039.6 | 0.8   |
| 1038.3 | 1014.5 | 4.8   |
| 1010.9 | 990.3  | 55.2  |
| 989.7  | 970.3  | 17.8  |
| 939.2  | 903.8  | 40.5  |
| 832.0  | 818.6  | 2.7   |
| 768.9  | 750.5  | 2.4   |
| 702.1  | 687.1  | 12.6  |
| 590.8  | 585.2  | 2.8   |
| 585.7  | 574.7  | 0.0   |
| 534.8  | 527.7  | 0.0   |
| 525.7  | 521.4  | 17.3  |
| 381.2  | 380.2  | 3.5   |
| 368.0  | 347.7  | 37.8  |
| 339.2  | 334.0  | 2.5   |
| 245.2  | 220.6  | 1.6   |
| 211.0  | 204.1  | 2.9   |
| 178.2  | 163.5  | 2.8   |
| 135.5  | 128.6  | 0.2   |
| 71.0   | 56.8   | 3.4   |

| TCT    |        |       |
|--------|--------|-------|
| Harm   | Anharm | Int   |
| 3142.4 | 3002.5 | 12.6  |
| 3139.1 | 2999.5 | 5.6   |
| 3100.2 | 2963.2 | 7.2   |
| 3058.7 | 2960.2 | 10.4  |
| 3042.2 | 2947.4 | 2.9   |
| 3013.4 | 2918.1 | 24.4  |
| 2790.4 | 2689.2 | 56.4  |
| 2360.9 | 2282.4 | 1.3   |
| 1717.0 | 1685.3 | 174.8 |
| 1682.2 | 1646.3 | 363.0 |
| 1482.0 | 1453.6 | 9.1   |
| 1480.6 | 1449.9 | 11.0  |
| 1475.8 | 1443.0 | 8.2   |
| 1462.1 | 1424.2 | 22.0  |
| 1418.0 | 1401.2 | 23.3  |
| 1394.2 | 1360.3 | 47.7  |
| 1339.8 | 1303.9 | 126.1 |
| 1232.3 | 1200.4 | 117.8 |
| 1115.0 | 1092.3 | 36.3  |
| 1064.8 | 1039.9 | 0.1   |
| 1045.4 | 1023.9 | 5.5   |
| 1012.1 | 993.2  | 44.4  |
| 982.8  | 964.6  | 3.4   |
| 921.0  | 908.7  | 25.3  |
| 861.6  | 853.1  | 47.1  |
| 777.9  | 764.0  | 5.1   |
| 705.1  | 693.7  | 12.1  |
| 582.2  | 580.5  | 12.4  |
| 571.7  | 561.8  | 3.4   |
| 531.7  | 526.7  | 0.5   |
| 518.0  | 514.2  | 6.7   |
| 374.7  | 375.3  | 2.9   |
| 340.9  | 337.6  | 0.6   |
| 278.7  | 275.2  | 42.2  |
| 197.9  | 193.5  | 3.7   |
| 193.0  | 178.8  | 3.7   |
| 176.6  | 161.7  | 0.0   |
| 142.2  | 141.0  | 2.0   |
| 66.5   | 61.4   | 3.9   |

| TTC    |        |       |
|--------|--------|-------|
| Harm   | Anharm | Int   |
| 3205.1 | 3059.5 | 2.5   |
| 3139.6 | 2999.9 | 10.4  |
| 3097.6 | 2963.0 | 7.6   |
| 3086.2 | 2935.2 | 5.3   |
| 3042.8 | 2924.9 | 11.8  |
| 3036.6 | 2937.5 | 5.5   |
| 2761.6 | 2663.7 | 32.5  |
| 2307.3 | 2228.6 | 8.1   |
| 1706.3 | 1672.7 | 194.1 |
| 1655.6 | 1609.4 | 417.1 |
| 1494.8 | 1445.7 | 1.5   |
| 1486.8 | 1448.1 | 46.7  |
| 1473.9 | 1432.8 | 13.8  |
| 1468.6 | 1428.2 | 2.7   |
| 1420.3 | 1386.3 | 23.3  |
| 1388.1 | 1354.2 | 31.5  |
| 1326.5 | 1298.0 | 169.8 |
| 1272.4 | 1238.8 | 16.4  |
| 1135.5 | 1109.7 | 137.3 |
| 1063.8 | 1037.7 | 1.3   |
| 1044.0 | 1021.4 | 2.7   |
| 1022.0 | 1003.0 | 4.1   |
| 997.9  | 980.1  | 73.7  |
| 910.7  | 887.2  | 48.1  |
| 824.5  | 812.7  | 0.5   |
| 772.5  | 758.1  | 3.2   |
| 731.5  | 712.8  | 19.8  |
| 584.3  | 576.5  | 0.0   |
| 578.2  | 577.3  | 19.2  |
| 540.0  | 536.9  | 0.4   |
| 483.6  | 476.8  | 2.4   |
| 395.2  | 392.9  | 10.0  |
| 369.7  | 351.9  | 49.2  |
| 321.0  | 323.8  | 5.8   |
| 230.5  | 239.1  | 0.9   |
| 226.3  | 231.0  | 6.8   |
| 173.9  | 168.1  | 0.6   |
| 82.0   | 71.5   | 0.1   |
| 49.1   | 45.6   | 3.9   |

| TTT    |        |       |
|--------|--------|-------|
| Harm   | Anharm | Int   |
| 3198.2 | 3055.0 | 2.1   |
| 3138.6 | 2996.9 | 10.4  |
| 3094.9 | 2960.3 | 9.0   |
| 3060.1 | 2922.2 | 8.6   |
| 3034.2 | 2936.7 | 7.5   |
| 3017.8 | 2904.1 | 24.4  |
| 2788.9 | 2695.5 | 57.5  |
| 2342.3 | 2265.3 | 2.1   |
| 1707.9 | 1671.1 | 168.0 |
| 1677.2 | 1638.0 | 398.5 |
| 1500.6 | 1461.8 | 0.2   |
| 1488.5 | 1458.1 | 26.7  |
| 1479.4 | 1437.7 | 14.9  |
| 1470.1 | 1428.7 | 3.2   |
| 1416.9 | 1400.9 | 17.3  |
| 1386.1 | 1352.2 | 34.1  |
| 1312.7 | 1276.9 | 272.8 |
| 1268.4 | 1234.7 | 38.9  |
| 1123.7 | 1101.1 | 28.3  |
| 1062.9 | 1037.4 | 0.9   |
| 1042.6 | 1021.8 | 3.1   |
| 1020.0 | 1002.6 | 3.3   |
| 990.8  | 976.6  | 99.2  |
| 919.2  | 906.0  | 51.9  |
| 815.9  | 807.2  | 3.5   |
| 764.8  | 751.6  | 1.4   |
| 747.7  | 731.7  | 13.1  |
| 579.6  | 577.1  | 26.7  |
| 577.8  | 573.4  | 1.3   |
| 525.7  | 530.8  | 11.7  |
| 486.6  | 481.7  | 2.3   |
| 402.7  | 399.1  | 2.1   |
| 321.8  | 326.5  | 6.7   |
| 260.0  | 257.3  | 49.8  |
| 236.6  | 232.9  | 0.7   |
| 227.3  | 220.2  | 0.5   |
| 180.3  | 179.5  | 0.0   |
| 110.3  | 127.6  | 0.4   |
| 48.3   | 52.6   | 0.2   |

| <b>Keto</b> |               |            |
|-------------|---------------|------------|
| <b>Harm</b> | <b>Anharm</b> | <b>Int</b> |
| 3145.4      | 3000.6        | 6.2        |
| 3145.2      | 3000.5        | 8.8        |
| 3086.7      | 2948.7        | 4.5        |
| 3086.5      | 2948.4        | 0.1        |
| 3030.6      | 2923.9        | 0.7        |
| 3030.5      | 2926.9        | 2.3        |
| 2333.5      | 2255.1        | 2.1        |
| 2230.7      | 2199.2        | 0.8        |
| 1793.8      | 1753.0        | 22.0       |
| 1766.2      | 1735.1        | 391.2      |
| 1474.5      | 1434.2        | 17.7       |
| 1473.6      | 1429.9        | 1.0        |
| 1466.5      | 1427.3        | 1.3        |
| 1466.2      | 1424.8        | 29.5       |
| 1390.0      | 1354.2        | 3.4        |
| 1389.8      | 1356.5        | 77.2       |
| 1230.0      | 1189.8        | 27.9       |
| 1186.8      | 1150.0        | 261.5      |
| 1090.8      | 1082.7        | 1.8        |
| 1082.1      | 1057.7        | 8.7        |
| 1077.8      | 1054.2        | 0.2        |
| 1018.2      | 1000.5        | 35.3       |
| 1008.0      | 992.8         | 1.6        |
| 942.3       | 923.1         | 16.0       |
| 797.2       | 783.0         | 0.0        |
| 795.0       | 783.4         | 4.6        |
| 758.3       | 741.1         | 0.3        |
| 740.5       | 726.1         | 12.7       |
| 627.8       | 621.5         | 1.4        |
| 520.7       | 518.8         | 19.0       |
| 492.7       | 490.6         | 6.1        |
| 479.2       | 476.2         | 5.8        |
| 358.3       | 363.7         | 1.7        |
| 318.5       | 328.3         | 0.9        |
| 162.4       | 150.8         | 0.0        |
| 161.7       | 147.4         | 0.1        |
| 142.5       | 144.1         | 1.0        |
| 56.9        | 54.4          | 8.5        |
| 46.5        | 42.7          | 11.5       |

Theoretical frequency values (and corresponding intensities: **Int**) of monodeuterated acetylacetonone (AcAcCD) calculated in the harmonic (**Harm**) and anharmonic (**Anharm**) approximations, with B3LYP functional and 6-311++g(3df,3pd) basis set.

| CCC    |        |       | CCT     |        |       |
|--------|--------|-------|---------|--------|-------|
| Harm   | Anharm | Int   | Harm    | Anharm | Int   |
| 3143.0 | 3004.2 | 12.2  | 3817.6  | 3630.2 | 79.0  |
| 3138.0 | 2997.3 | 9.5   | 3141.2  | 2997.3 | 12.1  |
| 3090.2 | 2947.0 | 4.8   | 3135.89 | 2994.3 | 7.6   |
| 3088.0 | 2958.6 | 6.5   | 3079.2  | 2940.1 | 11.0  |
| 3038.3 | 2941.3 | 17.7  | 3061.6  | 2922.1 | 9.8   |
| 3034.3 | 2934.9 | 5.3   | 3025.8  | 2947.2 | 5.3   |
| 3006.5 | 2351.4 | 359.2 | 3015.2  | 2966.7 | 22.7  |
| 2373.8 | 2296.2 | 0.8   | 2353.6  | 2272.5 | 3.1   |
| 1665.7 | 1608.6 | 355.3 | 1751.8  | 1715.3 | 174.7 |
| 1645.8 | 1603.9 | 282.7 | 1667.9  | 1623.7 | 415.7 |
| 1479.6 | 1446.9 | 38.0  | 1481.9  | 1458.2 | 14.5  |
| 1477.1 | 1447.4 | 6.7   | 1481.7  | 1451.8 | 5.3   |
| 1472.3 | 1429.1 | 9.6   | 1477.5  | 1440.3 | 9.7   |
| 1466.8 | 1427.8 | 20.6  | 1467.6  | 1438.0 | 15.6  |
| 1437.4 | 1397.8 | 179.8 | 1415.5  | 1401.4 | 10.4  |
| 1410.9 | 1365.8 | 35.2  | 1382.9  | 1349.7 | 37.9  |
| 1386.2 | 1358.9 | 45.3  | 1347.2  | 1314.4 | 59.0  |
| 1372.5 | 1289.1 | 72.6  | 1300.3  | 1263.1 | 287.6 |
| 1268.4 | 1232.1 | 134.8 | 1195.3  | 1165.8 | 71.2  |
| 1064.6 | 1041.4 | 6.0   | 1063.2  | 1038.1 | 0.5   |
| 1062.3 | 1039.0 | 0.7   | 1057.8  | 1037.2 | 3.4   |
| 1047.1 | 1024.3 | 7.9   | 1038.0  | 1015.5 | 4.9   |
| 1019.1 | 1001.4 | 9.6   | 1008.8  | 991.3  | 10.5  |
| 1006.0 | 986.2  | 69.9  | 927.7   | 910.9  | 16.4  |
| 947.8  | 933.0  | 13.6  | 875.3   | 863.1  | 57.7  |
| 911.0  | 907.3  | 32.4  | 855.7   | 841.4  | 10.6  |
| 848.7  | 838.9  | 0.9   | 675.5   | 666.5  | 6.2   |
| 671.4  | 671.0  | 4.4   | 631.9   | 620.9  | 12.0  |
| 647.0  | 635.6  | 12.5  | 591.9   | 582.3  | 17.1  |
| 579.2  | 575.5  | 11.3  | 537.5   | 532.4  | 2.7   |
| 558.7  | 557.2  | 0.0   | 483.6   | 482.9  | 15.6  |
| 512.9  | 511.1  | 11.2  | 415.7   | 383.7  | 78.0  |
| 391.4  | 398.9  | 2.5   | 372.1   | 369.7  | 4.8   |
| 373.4  | 362.9  | 7.1   | 340.8   | 340.6  | 0.3   |
| 231.5  | 227.7  | 3.3   | 191.4   | 178.6  | 1.5   |
| 180.7  | 174.3  | 0.0   | 173.3   | 173.6  | 3.6   |
| 148.6  | 146.3  | 0.0   | 139.2   | 137.2  | 2.1   |
| 118.2  | 126.9  | 1.2   | 103.9   | 100.2  | 0.3   |
| 27.9   | -9.1   | 0.1   | 60.4    | 56.9   | 3.7   |

| CTC    |        |       |
|--------|--------|-------|
| Harm   | Anharm | Int   |
| 3790.9 | 3620.1 | 43.6  |
| 3176.7 | 3030.1 | 6.1   |
| 3143.4 | 3002.4 | 10.6  |
| 3081.9 | 2940.3 | 10.3  |
| 3081.1 | 2940.6 | 6.0   |
| 3034.5 | 2938.9 | 16.2  |
| 3027.6 | 2946.2 | 4.5   |
| 2310.0 | 2227.2 | 11.7  |
| 1735.8 | 1700.0 | 166.3 |
| 1634.6 | 1574.7 | 571.7 |
| 1492.8 | 1450.9 | 7.8   |
| 1477.9 | 1440.3 | 8.4   |
| 1467.3 | 1434.5 | 12.4  |
| 1459.1 | 1417.2 | 74.1  |
| 1417.1 | 1381.7 | 55.6  |
| 1385.6 | 1351.7 | 42.8  |
| 1371.8 | 1338.7 | 16.0  |
| 1291.7 | 1252.9 | 28.2  |
| 1189.9 | 1146.0 | 229.9 |
| 1070.0 | 1043.4 | 1.2   |
| 1068.7 | 1040.1 | 15.5  |
| 1039.1 | 1018.3 | 2.7   |
| 1023.0 | 1006.2 | 33.9  |
| 948.1  | 927.1  | 90.3  |
| 864.3  | 844.9  | 11.9  |
| 827.3  | 813.3  | 4.0   |
| 707.9  | 700.1  | 29.1  |
| 631.1  | 619.5  | 39.5  |
| 588.7  | 592.0  | 4.4   |
| 499.2  | 473.8  | 61.7  |
| 489.8  | 488.2  | 21.3  |
| 480.7  | 484.7  | 12.1  |
| 396.3  | 393.4  | 1.6   |
| 340.3  | 346.5  | 1.7   |
| 212.6  | 228.0  | 3.2   |
| 166.9  | 162.6  | 0.4   |
| 106.2  | 90.4   | 1.3   |
| 98.7   | 107.1  | 0.1   |
| 57.6   | 59.6   | 1.5   |

| CTT    |        |       |
|--------|--------|-------|
| Harm   | Anharm | Int   |
| 3818.6 | 3635.6 | 83.7  |
| 3160.0 | 3020.4 | 10.4  |
| 3142.9 | 3001.8 | 11.5  |
| 3082.1 | 2942.0 | 9.0   |
| 3058.6 | 2920.7 | 10.5  |
| 3028.5 | 2947.5 | 3.6   |
| 3012.0 | 2924.0 | 31.0  |
| 2343.9 | 2262.6 | 4.2   |
| 1735.9 | 1699.4 | 184.6 |
| 1659.2 | 1616.9 | 399.5 |
| 1501.7 | 1447.3 | 6.9   |
| 1476.8 | 1441.7 | 8.1   |
| 1467.0 | 1436.1 | 13.1  |
| 1461.1 | 1425.1 | 21.0  |
| 1405.5 | 1372.6 | 47.6  |
| 1385.9 | 1353.1 | 56.6  |
| 1349.0 | 1314.0 | 360.8 |
| 1297.5 | 1261.5 | 37.1  |
| 1208.2 | 1174.9 | 28.4  |
| 1070.8 | 1049.0 | 36.1  |
| 1070.4 | 1043.6 | 1.2   |
| 1039.2 | 1017.1 | 3.5   |
| 1016.9 | 996.4  | 18.8  |
| 948.5  | 931.3  | 127.9 |
| 851.7  | 840.4  | 9.5   |
| 821.1  | 808.9  | 3.3   |
| 722.5  | 709.3  | 7.7   |
| 632.3  | 625.1  | 38.0  |
| 586.9  | 582.1  | 2.4   |
| 493.8  | 490.0  | 5.8   |
| 475.7  | 477.9  | 4.9   |
| 403.9  | 389.1  | 93.4  |
| 396.6  | 394.0  | 1.1   |
| 342.5  | 347.3  | 2.2   |
| 214.4  | 221.4  | 10.6  |
| 170.2  | 166.9  | 0.4   |
| 133.1  | 113.5  | 0.1   |
| 101.9  | 108.7  | 0.1   |
| 62.7   | 56.4   | 8.9   |



| TCC    |        |       |
|--------|--------|-------|
| Harm   | Anharm | Int   |
| 3803.9 | 3606.8 | 86.2  |
| 3145.3 | 3006.5 | 7.3   |
| 3134.5 | 2995.5 | 5.5   |
| 3084.9 | 2943.3 | 6.3   |
| 3063.5 | 2898.7 | 7.3   |
| 3036.1 | 2962.6 | 11.2  |
| 3004.5 | 29630  | 8.9   |
| 2359.2 | 2275.5 | 0.7   |
| 1716.9 | 1682.3 | 208.7 |
| 1656.8 | 1618.8 | 442.5 |
| 1496.3 | 1491.8 | 8.7   |
| 1487.6 | 1472.7 | 9.2   |
| 1479.5 | 1451.7 | 38.4  |
| 1473.7 | 1433.3 | 8.1   |
| 1424.4 | 1402.9 | 32.2  |
| 1378.6 | 1344.0 | 40.2  |
| 1372.1 | 1337.2 | 70.5  |
| 1296.2 | 1264.9 | 78.7  |
| 1199.9 | 1170.4 | 122.9 |
| 1065.5 | 1040.4 | 0.6   |
| 1053.5 | 1029.3 | 44.6  |
| 1038.3 | 1014.4 | 4.5   |
| 1002.4 | 987.2  | 31.7  |
| 987.7  | 968.1  | 9.6   |
| 867.2  | 854.2  | 15.6  |
| 770.7  | 751.3  | 2.5   |
| 702.1  | 685.5  | 12.9  |
| 602.2  | 591.8  | 2.5   |
| 591.3  | 575.3  | 2.6   |
| 535.1  | 527.8  | 0.4   |
| 527.0  | 523.9  | 17.5  |
| 490.6  | 469.4  | 68.3  |
| 389.2  | 387.2  | 3.6   |
| 343.3  | 338.1  | 1.8   |
| 245.4  | 219.9  | 1.4   |
| 214.0  | 208.5  | 2.9   |
| 179.0  | 164.7  | 2.5   |
| 136.3  | 128.6  | 0.1   |
| 72.1   | 59.4   | 3.5   |

| TCT    |        |       |
|--------|--------|-------|
| Harm   | Anharm | Int   |
| 3832.0 | 3642.2 | 89.1  |
| 3142.4 | 2999.2 | 12.6  |
| 3139.1 | 3001.3 | 5.6   |
| 3100.2 | 2960.4 | 7.2   |
| 3058.8 | 2918.3 | 10.6  |
| 3042.2 | 2947.7 | 2.8   |
| 3013.4 | 2965.2 | 23.4  |
| 2360.9 | 2276.2 | 1.2   |
| 1718.5 | 1684.5 | 114.7 |
| 1695.9 | 1660.6 | 405.8 |
| 1482.1 | 1451.4 | 8.6   |
| 1481.6 | 1460.4 | 6.5   |
| 1475.8 | 1443.4 | 8.3   |
| 1462.1 | 1424.4 | 21.3  |
| 1418.0 | 1401.8 | 22.2  |
| 1394.2 | 1360.4 | 47.9  |
| 1340.4 | 1304.8 | 140.4 |
| 1288.9 | 1251.2 | 148.3 |
| 1216.3 | 1188.2 | 90.8  |
| 1064.8 | 1040.7 | 0.1   |
| 1061.6 | 1041.1 | 7.3   |
| 1045.5 | 1023.0 | 5.2   |
| 1012.2 | 993.6  | 45.5  |
| 980.8  | 965.1  | 9.1   |
| 864.9  | 850.9  | 40.7  |
| 778.5  | 765.1  | 4.3   |
| 705.2  | 695.2  | 12.9  |
| 592.9  | 586.3  | 9.0   |
| 579.4  | 568.9  | 11.6  |
| 532.1  | 528.2  | 1.0   |
| 525.8  | 522.8  | 8.4   |
| 383.4  | 381.3  | 2.6   |
| 365.3  | 364.0  | 80.8  |
| 341.6  | 335.3  | 0.6   |
| 200.1  | 195.7  | 3.8   |
| 197.0  | 182.7  | 1.7   |
| 177.1  | 162.0  | 0.02  |
| 142.5  | 141.2  | 1.7   |
| 67.2   | 63.6   | 4.0   |

| TTC    |        |       |
|--------|--------|-------|
| Harm   | Anharm | Int   |
| 3794.8 | 3610.3 | 49.7  |
| 3205.1 | 3059.7 | 2.6   |
| 3139.6 | 3000.7 | 10.4  |
| 3097.6 | 2963.3 | 7.6   |
| 3086.2 | 2935.2 | 5.3   |
| 3042.8 | 2925.4 | 11.8  |
| 3036.6 | 2937.5 | 5.5   |
| 2307.4 | 2229.3 | 7.9   |
| 1706.8 | 1675.4 | 173.8 |
| 1662.4 | 1617.8 | 460.3 |
| 1494.8 | 1444.5 | 1.4   |
| 1487.0 | 1448.9 | 45.8  |
| 1473.9 | 1431.1 | 14.2  |
| 1468.6 | 1427.8 | 2.7   |
| 1424.5 | 1389.7 | 25.2  |
| 1388.9 | 1355.4 | 33.8  |
| 1372.9 | 1342.0 | 25.8  |
| 1275.2 | 1242.2 | 2.1   |
| 1219.1 | 1199.3 | 369   |
| 1072.7 | 1062.0 | 4.3   |
| 1063.9 | 1037.5 | 1.1   |
| 1044.1 | 1021.9 | 2.7   |
| 1022.4 | 1004.2 | 3.8   |
| 998.6  | 984.4  | 71.2  |
| 829.0  | 816.9  | 3.1   |
| 773.9  | 759.3  | 1.9   |
| 733.2  | 714.1  | 26.6  |
| 588.6  | 578.8  | 3.9   |
| 581.7  | 581.3  | 20.9  |
| 545.4  | 541.0  | 0.8   |
| 494.7  | 466.8  | 86.6  |
| 482.7  | 474.0  | 1.2   |
| 409.6  | 405.0  | 10.1  |
| 323.3  | 326.6  | 6     |
| 230.7  | 239.5  | 0.7   |
| 228.2  | 233.2  | 6.5   |
| 175.3  | 170.0  | 0.9   |
| 82     | 72.1   | 0.1   |
| 49.7   | 48.7   | 3.9   |

| TTT    |         |       |
|--------|---------|-------|
| Harm   | Anharm  | Int   |
| 3830.0 | 3651.6  | 88.4  |
| 3198.2 | 3055.5  | 2.0   |
| 3138.6 | 2997.0  | 10.4  |
| 3094.9 | 2960.3  | 9.0   |
| 3060.1 | 2922.2  | 8.7   |
| 3034.2 | 2936.7  | 7.5   |
| 3017.8 | 2956.4  | 23.5  |
| 2342.3 | 2260.0  | 2.1   |
| 1709.1 | 1676.5  | 109.6 |
| 1687.8 | 1648.9  | 416.0 |
| 1500.6 | 1460.5  | 0.2   |
| 1489.6 | 1459.8  | 16.1  |
| 1479.5 | 1438.8  | 14.4  |
| 1470.2 | 1428.89 | 3.5   |
| 1416.9 | 1401.2  | 18.7  |
| 1386.9 | 1352.4  | 60.5  |
| 1348.1 | 1309.6  | 343.9 |
| 1269.8 | 1236.0  | 51.2  |
| 1234.8 | 1206.4  | 6.0   |
| 1075.3 | 1053.6  | 99.3  |
| 1062.9 | 1037.9  | 0.8   |
| 1042.7 | 1021.7  | 3.5   |
| 1020.5 | 1003.0  | 2.5   |
| 989.9  | 977.4   | 73.0  |
| 816.4  | 806.2   | 4.7   |
| 766.6  | 751.2   | 1.2   |
| 749.0  | 733.5   | 9.7   |
| 582.1  | 576.0   | 5.4   |
| 581.0  | 578.4   | 26.5  |
| 539.7  | 540.9   | 11.0  |
| 486.9  | 482.8   | 3.6   |
| 411.9  | 406.7   | 1.6   |
| 349.9  | 351.9   | 91.9  |
| 322.3  | 327.5   | 6.8   |
| 237.2  | 233.2   | 0.02  |
| 229.6  | 221.9   | 06    |
| 183.1  | 182.6   | 0.5   |
| 110.3  | 128.0   | 0.4   |
| 48.3   | 52.5    | 0.2   |

| <b>Keto</b> |               |            |
|-------------|---------------|------------|
| <b>Harm</b> | <b>Anharm</b> | <b>Int</b> |
| 3145.4      | 3000.8        | 6.3        |
| 3145.3      | 3000.7        | 8.7        |
| 3107.9      | 2970.7        | 4.3        |
| 3086.7      | 2948.7        | 4.3        |
| 3086.5      | 2948.8        | 0.2        |
| 3030.6      | 2923.6        | 0.7        |
| 3030.4      | 2923.7        | 2.2        |
| 2280.4      | 2211.4        | 1.3        |
| 1795.9      | 1772.3        | 21.5       |
| 1767.3      | 1730.49       | 388.9      |
| 1474.5      | 1430.3        | 17.7       |
| 1473.9      | 1432.7        | 1          |
| 1466.8      | 1423.7        | 2          |
| 1466.3      | 1426.8        | 27.8       |
| 1390.5      | 1356.8        | 5.7        |
| 1390.0      | 1357.7        | 76.2       |
| 1326.1      | 1294.5        | 19.5       |
| 1261.5      | 1229.0        | 23.5       |
| 1199.3      | 1164.7        | 162.6      |
| 1173.2      | 1144.5        | 98.3       |
| 1080.5      | 1056.6        | 0.8        |
| 1044.6      | 1020.7        | 6.1        |
| 1024.9      | 1006.6        | 26.6       |
| 975.9       | 956.0         | 4.3        |
| 888.8       | 874.4         | 17.1       |
| 821.7       | 809.9         | 4.5        |
| 772.5       | 756.0         | 2.5        |
| 750.1       | 734.1         | 9.2        |
| 628.0       | 618.3         | 1.5        |
| 534.6       | 533.3         | 22.7       |
| 496.7       | 494.9         | 3.3        |
| 483.1       | 479.8         | 6.6        |
| 381.7       | 388.3         | 1.7        |
| 320.5       | 329.9         | 0.8        |
| 162.5       | 151.2         | 0.02       |
| 161.7       | 148.1         | 0.06       |
| 142.9       | 144.2         | 1.0        |
| 56.9        | 54.9          | 8.5        |
| 47.0        | 44.4          | 11.7       |

Theoretical frequency values (and corresponding intensities: **Int**) of monodeuterated acetylacetone (AcAcOD) calculated in the harmonic (**Harm**) and anharmonic (**Anharm**) approximations, with B3LYP functional and 6-311++g(3df,3pd) basis set.

| CCC    |        |       | CCT    |        |       |
|--------|--------|-------|--------|--------|-------|
| Harm   | Anharm | Int   | Harm   | Anharm | Int   |
| 3211.8 | 3083.3 | 2.9   | 3188.7 | 3063.4 | 6.5   |
| 3142.9 | 3003.3 | 9.5   | 3141.2 | 2996.8 | 11.7  |
| 3137.7 | 2996.2 | 9.1   | 3135.5 | 2992.9 | 6.8   |
| 3090.2 | 2947.6 | 4.8   | 3079.2 | 2940.2 | 11.0  |
| 3088.0 | 2961.8 | 6.5   | 3061.5 | 2922.1 | 9.7   |
| 3038.2 | 2928.5 | 7.8   | 3025.8 | 2946.9 | 5.3   |
| 3034.0 | 2946.4 | 2.5   | 3015.2 | 2878.0 | 23.4  |
| 2200.2 | 1819.3 | 258.7 | 2779.7 | 2680.4 | 50.7  |
| 1673.7 | 1625.5 | 273.2 | 1756.7 | 1720.1 | 190.7 |
| 1566.5 | 1517.1 | 383.6 | 1659.9 | 1621.1 | 429.1 |
| 1490.5 | 1454.2 | 32.1  | 1486.8 | 1464.5 | 13.1  |
| 1477.1 | 1447.7 | 6.6   | 1481.7 | 1451.8 | 5.7   |
| 1472.3 | 1424.4 | 9.3   | 1477.5 | 1440.3 | 9.8   |
| 1464.7 | 1434.0 | 39.0  | 1467.8 | 1437.0 | 12.7  |
| 1434.9 | 1399.8 | 63.6  | 1423.3 | 1392.0 | 55.4  |
| 1410.9 | 1373.4 | 1.7   | 1410.7 | 1380.5 | 2.7   |
| 1391.1 | 1361.4 | 49.6  | 1380.9 | 1348.8 | 42.9  |
| 1304.5 | 1260.7 | 119.1 | 1249.0 | 1212.6 | 196.7 |
| 1198.4 | 1170.2 | 21.0  | 1192.4 | 1167.7 | 48.4  |
| 1112.5 | 1039.3 | 66.3  | 1065.7 | 1039.4 | 1.6   |
| 1063.3 | 1041.8 | 2.1   | 1060.3 | 1039.5 | 7.0   |
| 1047.3 | 1025.0 | 7.0   | 1038.7 | 1017.0 | 5.8   |
| 1032.6 | 1013.7 | 15.7  | 995.2  | 976.8  | 10.8  |
| 991.3  | 978.9  | 33.1  | 931.5  | 911.5  | 29.6  |
| 938.5  | 923.3  | 3.6   | 914.1  | 896.6  | 2.9   |
| 901.9  | 890.5  | 20.3  | 876.8  | 865.8  | 82.6  |
| 801.8  | 792.9  | 7.9   | 819.5  | 804.6  | 20.0  |
| 746.6  | 734.1  | 50.1  | 642.5  | 633.7  | 0.1   |
| 642.7  | 641.1  | 14.4  | 626.8  | 617.7  | 13.6  |
| 631.7  | 622.3  | 6.5   | 536.2  | 530.6  | 1.2   |
| 558.7  | 559.0  | 1.1   | 468.5  | 469.6  | 15.7  |
| 505.3  | 503.3  | 10.4  | 374.4  | 373.9  | 5.0   |
| 397.1  | 405.3  | 2.8   | 337.5  | 339.7  | 0.4   |
| 365.8  | 357.9  | 7.2   | 316.8  | 298.4  | 42.3  |
| 228.8  | 225.7  | 3.3   | 190.0  | 178.1  | 2.6   |
| 182.3  | 176.3  | 0.1   | 172.1  | 174.8  | 3.6   |
| 149.4  | 147.7  | 0.0   | 141.0  | 138.1  | 2.3   |
| 119.4  | 128.0  | 1.2   | 103.8  | 100.8  | 0.3   |
| 28.0   | 3.4    | 0.1   | 59.9   | 57.6   | 3.7   |

| CTC    |        |       |
|--------|--------|-------|
| Harm   | Anharm | Int   |
| 3176.7 | 3030.7 | 6.2   |
| 3143.5 | 3003.2 | 12.2  |
| 3129.9 | 3008.9 | 16.2  |
| 3081.9 | 2940.4 | 10.3  |
| 3081.1 | 2940.7 | 6.0   |
| 3034.5 | 2941.5 | 16.1  |
| 3027.5 | 2933.4 | 4.1   |
| 2758.7 | 2671.7 | 28.1  |
| 1742.1 | 1705.7 | 168.5 |
| 1634.7 | 1577.1 | 556.5 |
| 1492.7 | 1453.1 | 7.5   |
| 1477.9 | 1437.7 | 8.3   |
| 1469.3 | 1424.6 | 11.4  |
| 1460.6 | 1420.0 | 89.1  |
| 1434.1 | 1395.1 | 39.1  |
| 1393.5 | 1358.6 | 19.8  |
| 1382.4 | 1352.4 | 15.6  |
| 1296.7 | 1261.9 | 50.7  |
| 1187.9 | 1151.1 | 137.7 |
| 1071.3 | 1046.3 | 0.7   |
| 1056.1 | 1030.6 | 3.0   |
| 1039.8 | 1018.8 | 3.8   |
| 1009.3 | 986.2  | 40.6  |
| 959.3  | 940.0  | 131.7 |
| 895.7  | 864.7  | 33.8  |
| 837.4  | 825.5  | 2.7   |
| 837.3  | 826.3  | 32.3  |
| 631.0  | 619.2  | 38.4  |
| 598.7  | 605.6  | 0.0   |
| 538.5  | 537.7  | 0.1   |
| 472.9  | 479.1  | 12.2  |
| 385.2  | 383.4  | 3.2   |
| 373.6  | 351.1  | 49.1  |
| 340.8  | 349.0  | 1.6   |
| 211.5  | 229.7  | 3.1   |
| 170.0  | 167.9  | 0.3   |
| 106.3  | 91.9   | 1.3   |
| 98.7   | 110.5  | 0.1   |
| 57.5   | 59.3   | 1.5   |

| CTT    |        |       |
|--------|--------|-------|
| Harm   | Anharm | Int   |
| 3175.2 | 3042.8 | 4.8   |
| 3160.0 | 3018.6 | 10.7  |
| 3142.9 | 3002.4 | 11.0  |
| 3082.1 | 2942.1 | 9.1   |
| 3058.6 | 2920.7 | 10.4  |
| 3028.4 | 2945.8 | 3.5   |
| 3011.9 | 2914.5 | 32.2  |
| 2780.2 | 2683.7 | 53.4  |
| 1741.4 | 1707.8 | 175.2 |
| 1654.1 | 1606.9 | 485.9 |
| 1501.6 | 1448.4 | 7.4   |
| 1476.9 | 1438.6 | 8.0   |
| 1468.0 | 1438.7 | 9.1   |
| 1460.5 | 1420.8 | 49.8  |
| 1421.5 | 1388.8 | 102.4 |
| 1389.9 | 1359.7 | 45.7  |
| 1381.2 | 1350.8 | 12.7  |
| 1293.9 | 1256.5 | 40.0  |
| 1177.0 | 1148.9 | 157.0 |
| 1071.8 | 1044.7 | 0.4   |
| 1055.1 | 1032.6 | 60.6  |
| 1040.3 | 1017.4 | 4.8   |
| 989.4  | 969.9  | 1.9   |
| 956.9  | 939.4  | 64.6  |
| 909.3  | 895.5  | 77.7  |
| 872.3  | 853.8  | 24.1  |
| 839.4  | 827.6  | 8.7   |
| 631.5  | 623.5  | 37.0  |
| 601.0  | 596.8  | 0.5   |
| 528.2  | 525.2  | 2.1   |
| 461.5  | 462.4  | 5.3   |
| 394.2  | 392.0  | 1.0   |
| 343.3  | 348.7  | 2.3   |
| 300.4  | 291.5  | 49.8  |
| 213.1  | 211.5  | 10.9  |
| 171.6  | 169.3  | 0.0   |
| 133.2  | 112.8  | 0.1   |
| 101.9  | 101.4  | 0.1   |
| 63.1   | 56.8   | 9.0   |

| TCC    |        |       |
|--------|--------|-------|
| Harm   | Anharm | Int   |
| 3196.7 | 3064.5 | 2.2   |
| 3144.9 | 3005.2 | 6.8   |
| 3134.5 | 2995.6 | 5.5   |
| 3084.9 | 2943.3 | 6.4   |
| 3063.5 | 2898.1 | 7.2   |
| 3036.0 | 2961.4 | 11.4  |
| 3005.0 | 2953.9 | 8.9   |
| 2767.4 | 2662.4 | 51.8  |
| 1718.4 | 1686.4 | 258.3 |
| 1661.0 | 1630.2 | 347.3 |
| 1495.6 | 1487.4 | 10.1  |
| 1486.7 | 1469.0 | 8.0   |
| 1482.7 | 1453.6 | 24.2  |
| 1473.6 | 1435.3 | 7.8   |
| 1423.0 | 1402.0 | 48.9  |
| 1390.4 | 1353.7 | 93.9  |
| 1377.8 | 1342.9 | 42.6  |
| 1283.5 | 1257.7 | 131.4 |
| 1213.7 | 1187.6 | 7.7   |
| 1067.8 | 1041.7 | 2.1   |
| 1061.0 | 1039.9 | 15.2  |
| 1040.0 | 1016.3 | 6.1   |
| 1002.1 | 982.5  | 100.2 |
| 990.3  | 971.7  | 19.0  |
| 868.5  | 845.9  | 7.0   |
| 857.1  | 834.6  | 17.4  |
| 792.8  | 775.2  | 3.0   |
| 628.3  | 615.5  | 1.6   |
| 593.4  | 587.5  | 3.2   |
| 544.7  | 537.0  | 0.0   |
| 533.1  | 529.7  | 18.1  |
| 381.2  | 381.3  | 3.4   |
| 368.3  | 348.0  | 37.7  |
| 340.4  | 335.6  | 2.6   |
| 245.2  | 220.5  | 1.6   |
| 211.8  | 204.8  | 3.0   |
| 181.1  | 167.2  | 2.9   |
| 137.1  | 129.0  | 0.1   |
| 71.2   | 57.1   | 3.3   |

| TCT    |        |       |
|--------|--------|-------|
| Harm   | Anharm | Int   |
| 3197.6 | 3064.0 | 3.1   |
| 3142.4 | 2999.5 | 12.7  |
| 3138.8 | 3001.7 | 5.3   |
| 3100.2 | 2960.3 | 7.2   |
| 3058.7 | 2918.2 | 10.4  |
| 3042.2 | 2948.1 | 2.9   |
| 3013.4 | 2885.1 | 24.3  |
| 2790.4 | 2689.4 | 56.4  |
| 1718.6 | 1689.1 | 208.6 |
| 1695.6 | 1658.8 | 309.2 |
| 1483.2 | 1465.8 | 4.1   |
| 1482.0 | 1449.4 | 9.3   |
| 1475.8 | 1444.9 | 8.2   |
| 1462.2 | 1423.5 | 25.0  |
| 1418.6 | 1400.1 | 29.4  |
| 1394.6 | 1360.5 | 48.1  |
| 1379.5 | 1342.1 | 81.3  |
| 1284.2 | 1255.5 | 140.0 |
| 1207.3 | 1175.7 | 61.2  |
| 1067.3 | 1042.5 | 1.1   |
| 1058.9 | 1040.0 | 12.7  |
| 1047.7 | 1026.7 | 7.2   |
| 1009.2 | 990.7  | 42.4  |
| 950.9  | 934.0  | 6.7   |
| 901.5  | 900.9  | 65.8  |
| 860.4  | 841.4  | 20.3  |
| 808.7  | 794.7  | 13.6  |
| 622.5  | 613.6  | 0.0   |
| 585.8  | 583.7  | 13.5  |
| 535.1  | 531.1  | 1.5   |
| 524.4  | 520.4  | 6.6   |
| 374.8  | 372.6  | 2.9   |
| 342.1  | 337.9  | 0.6   |
| 279.0  | 275.3  | 41.5  |
| 198.6  | 194.4  | 3.8   |
| 194.5  | 184.6  | 4.3   |
| 176.6  | 161.2  | 0.0   |
| 144.2  | 142.6  | 2.0   |
| 67.0   | 61.6   | 3.9   |

| TTC    |        |       |
|--------|--------|-------|
| Harm   | Anharm | Int   |
| 3205.1 | 3060.2 | 2.6   |
| 3139.6 | 3001.5 | 9.9   |
| 3127.3 | 3001.7 | 14.4  |
| 3097.6 | 2963.2 | 7.6   |
| 3086.2 | 2935.0 | 5.3   |
| 3042.7 | 2925.4 | 11.7  |
| 3036.6 | 2937.6 | 5.6   |
| 2761.6 | 2664.6 | 31.9  |
| 1708.8 | 1677.6 | 217.4 |
| 1668.2 | 1628.4 | 378.5 |
| 1494.8 | 1448.3 | 1.5   |
| 1487.9 | 1450.0 | 38.4  |
| 1473.9 | 1432.8 | 14.0  |
| 1469.1 | 1428.0 | 3.0   |
| 1428.1 | 1393.3 | 24.6  |
| 1389.8 | 1356.7 | 23.3  |
| 1382.1 | 1351.4 | 23.5  |
| 1294.1 | 1264.0 | 108.7 |
| 1250.8 | 1221.9 | 208.9 |
| 1065.4 | 1041.3 | 0.3   |
| 1050.0 | 1026.9 | 2.6   |
| 1045.9 | 1023.9 | 4.9   |
| 1024.8 | 1005.9 | 4.6   |
| 960.7  | 949.1  | 128.7 |
| 878.3  | 852.0  | 30.3  |
| 867.0  | 843.9  | 5.2   |
| 789.1  | 774.2  | 2.1   |
| 588.4  | 580.3  | 0.0   |
| 582.4  | 580.0  | 20.6  |
| 545.6  | 543.5  | 0.6   |
| 532.4  | 525.2  | 0.1   |
| 395.5  | 395.1  | 10.1  |
| 370.4  | 352.9  | 50.5  |
| 321.6  | 324.7  | 5.8   |
| 230.8  | 237.2  | 0.9   |
| 227.3  | 232.5  | 6.8   |
| 178.9  | 172.9  | 0.6   |
| 82.4   | 70.9   | 0.1   |
| 49.1   | 44.3   | 3.9   |

| TTT    |        |       |
|--------|--------|-------|
| Harm   | Anharm | Int   |
| 3198.2 | 3056.5 | 2.1   |
| 3174.8 | 3050.1 | 2.1   |
| 3138.6 | 2997.1 | 10.4  |
| 3094.9 | 2960.4 | 9.0   |
| 3060.1 | 2922.4 | 8.6   |
| 3034.2 | 2936.8 | 7.5   |
| 3017.8 | 2906.7 | 24.3  |
| 2788.9 | 2695.2 | 57.4  |
| 1709.4 | 1675.6 | 193.5 |
| 1689.7 | 1641.8 | 364.1 |
| 1500.6 | 1463.9 | 0.2   |
| 1489.1 | 1460.5 | 23.6  |
| 1479.5 | 1440.8 | 15.1  |
| 1470.2 | 1430.8 | 4.0   |
| 1421.6 | 1399.3 | 26.0  |
| 1387.2 | 1354.1 | 25.0  |
| 1371.7 | 1345.0 | 77.1  |
| 1290.7 | 1254.6 | 78.7  |
| 1230.2 | 1201.1 | 229.1 |
| 1064.7 | 1039.6 | 0.1   |
| 1047.9 | 1029.3 | 45.1  |
| 1045.2 | 1022.9 | 6.0   |
| 1022.9 | 1003.6 | 0.3   |
| 932.1  | 918.5  | 3.1   |
| 910.8  | 886.7  | 23.0  |
| 890.4  | 877.2  | 74.7  |
| 781.8  | 764.5  | 1.9   |
| 585.7  | 580.6  | 1.4   |
| 584.7  | 582.5  | 30.4  |
| 531.3  | 535.1  | 10.3  |
| 524.9  | 522.6  | 1.9   |
| 403.1  | 400.5  | 2.1   |
| 322.6  | 327.7  | 6.6   |
| 260.9  | 257.8  | 49.0  |
| 236.8  | 233.6  | 1.0   |
| 228.3  | 221.9  | 0.5   |
| 184.3  | 183.6  | 0.0   |
| 110.9  | 127.9  | 0.4   |
| 48.4   | 52.5   | 0.1   |

| <b>Keto</b> |               |            |
|-------------|---------------|------------|
| <b>Harm</b> | <b>Anharm</b> | <b>Int</b> |
| 3145.4      | 3000.8        | 6.3        |
| 3145.3      | 3000.7        | 8.7        |
| 3107.9      | 2970.7        | 4.3        |
| 3086.7      | 2948.7        | 4.3        |
| 3086.5      | 2948.8        | 0.2        |
| 3030.6      | 2923.6        | 0.7        |
| 3030.4      | 2923.7        | 2.2        |
| 2280.4      | 2211.4        | 1.3        |
| 1795.9      | 1772.3        | 21.5       |
| 1767.3      | 1730.5        | 388.9      |
| 1474.5      | 1430.3        | 17.7       |
| 1473.9      | 1432.7        | 1.0        |
| 1466.8      | 1423.7        | 2.0        |
| 1466.3      | 1426.8        | 27.8       |
| 1390.5      | 1356.8        | 5.7        |
| 1390.0      | 1357.7        | 76.2       |
| 1326.1      | 1294.5        | 19.5       |
| 1261.5      | 1229.0        | 23.5       |
| 1199.3      | 1164.7        | 162.6      |
| 1173.2      | 1144.5        | 98.3       |
| 1080.5      | 1056.6        | 0.8        |
| 1044.6      | 1020.7        | 6.1        |
| 1024.9      | 1006.6        | 26.6       |
| 975.9       | 956.0         | 4.3        |
| 888.8       | 874.4         | 17.1       |
| 821.7       | 809.9         | 4.5        |
| 772.5       | 756.0         | 2.5        |
| 750.1       | 734.1         | 9.2        |
| 628.0       | 618.3         | 1.5        |
| 534.6       | 533.3         | 22.7       |
| 496.7       | 494.9         | 3.3        |
| 483.1       | 479.8         | 6.6        |
| 381.7       | 388.3         | 1.7        |
| 320.5       | 329.9         | 0.8        |
| 162.5       | 151.2         | 0.0        |
| 161.7       | 148.1         | 0.1        |
| 142.9       | 144.2         | 1.0        |
| 56.9        | 54.9          | 8.5        |
| 47.0        | 44.4          | 11.7       |
